## CORRECTION

# Correction: Separating underwater ambient noise from flow noise recorded on stereo acoustic tags attached to marine mammals

**Alexander M. von Benda-Beckmann, Paul J. Wensveen, Filipa I. P. Samarra, S. Peter Beerens and Patrick J. O. Miller**

There was an error published in *J. Exp. Biol.* **219**, pp. 2271-2275.

The units below Eqn 4 for  $p_{\text{ref}}$  are incorrect. The text should read:  $p_{\text{ref}}=1 \mu\text{Pa}$ .

We apologise to the authors and readers for any inconvenience this may have caused.
